# Supplementary material
Source: publisher figshare collection journal article supplement (https://acs.figshare.com/ndownloader/files/4615300)
Supplement: Supplementary file 1 [file 4615300]

# Effect of electrochemical reduction and oxidation of a viscose rayon based activated carbon cloth for Cr(VI) sorption from aqueous solution

*Ibiba D. Harry, Basu Saha\*, Iain W. Cumming*

Advanced Separation Technologies Group, Department of Chemical Engineering, Loughborough University, Loughborough, Leicestershire, LE11 3TU, United Kingdom

\*Corresponding author. Tel: +44-1509-222505; Fax: +44-1509-223923; E-mail: [b.saha@lboro.ac.uk](mailto:b.saha@lboro.ac.uk)

## Supporting Information

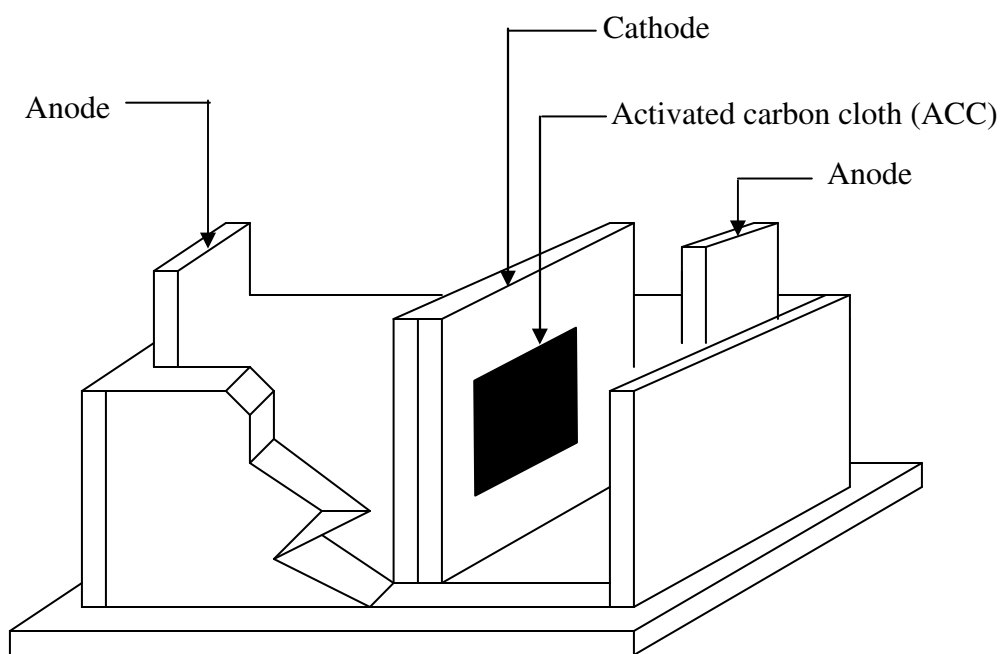

**Figure S1.** Schematic of the electrochemical cell used for electrochemical reduction.

## 1. Scanning Electron Microscopy (SEM)

Scanning electron micrographs (SEMs) of as-received ACC, EO ACC and ER ACC used in this investigation are shown in Figure S2. The micrographs of the three ACCs are very similar. Therefore, no significant breakage of fibres was observed during electrochemical oxidation of ACC at 1.1 A for 6 h, and electrochemical reduction of ACC at 5.5 A for 3 h. Therefore, all ACCs used in this investigation are suitable for adsorption studies.

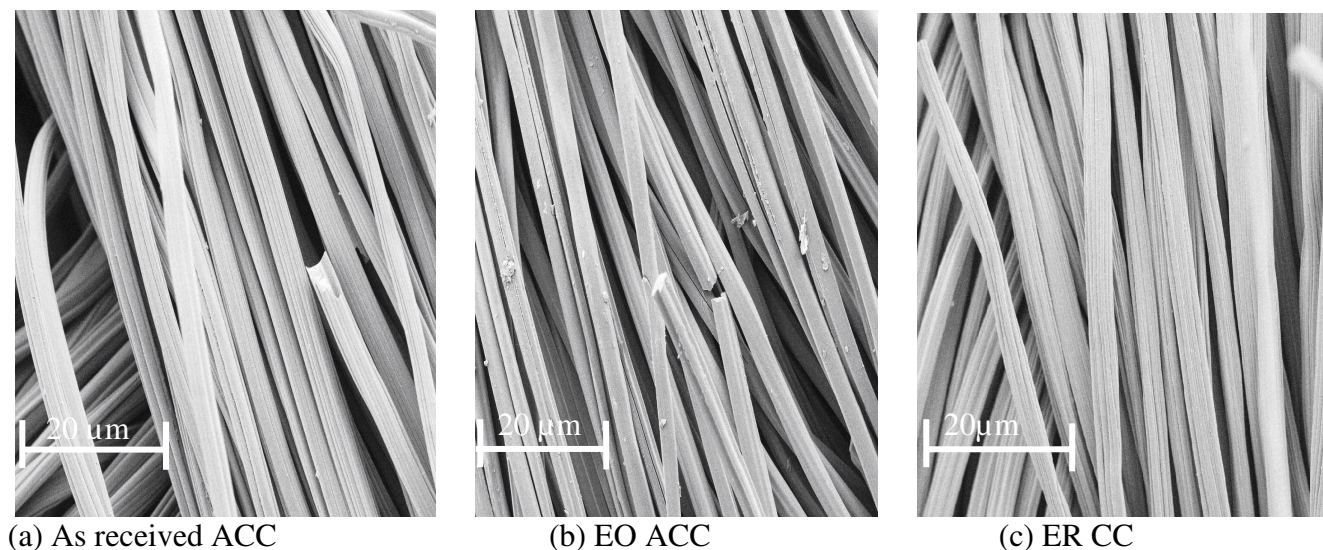

**Figure S2.** SEM of ACCs: (a) as -received ACC, (b) EO ACC and (c) ER ACC.

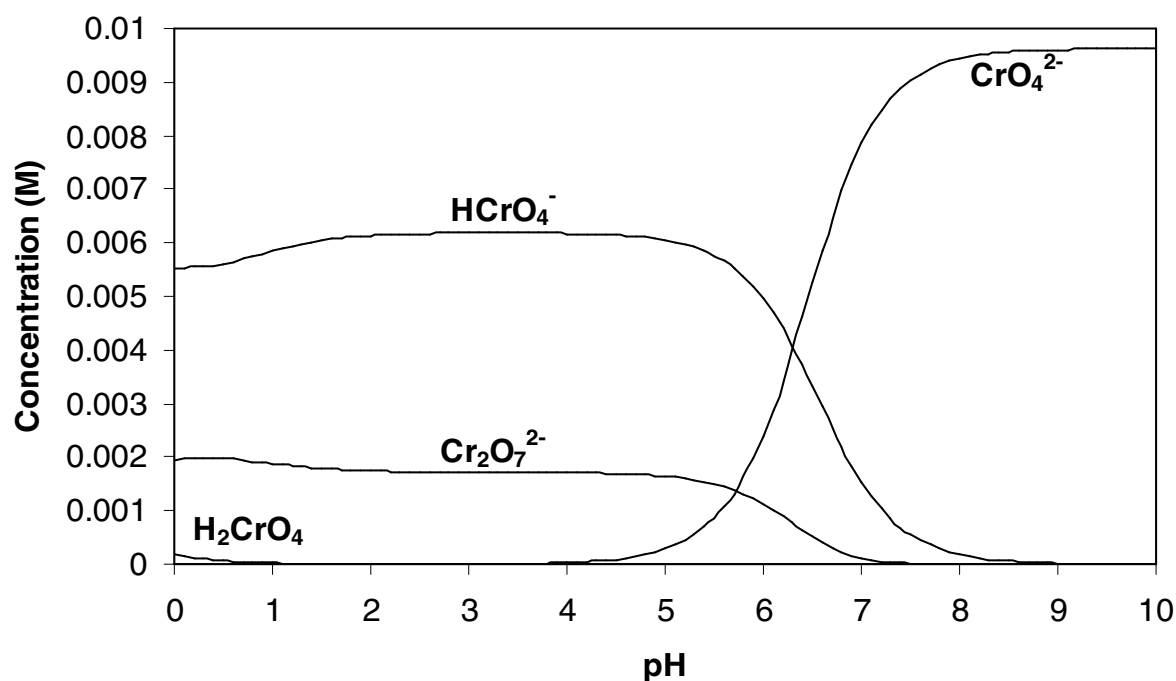

**Figure S3.** Speciation curve for 0.01 M chromium(VI) in sodium dichromate solution

**Table S1. Langmuir and Freundlich isotherm constants and experimental values for maximum chromium(VI) ions sorbed ( $q_e$ ) for ACCs at pH values of 4, 6 and 8**

| Sample           | pH | $q_e$<br>(mmol/g) | Langmuir isotherm constants |       |       | Freundlich isotherm constants |       |       |
|------------------|----|-------------------|-----------------------------|-------|-------|-------------------------------|-------|-------|
|                  |    |                   | $q_{\max}$<br>(mmol/g)      | b     | $R^2$ | $K_f$                         | 1/n   | $R^2$ |
| As -received ACC | 4  | 1.79              | 1.96                        | 2.685 | 0.996 | 1.124                         | 0.345 | 0.856 |
| As -received ACC | 6  | 0.78              | 0.815                       | 2.785 | 0.998 | 0.506                         | 0.264 | 0.851 |
| As -received ACC | 8  | 0.074             | 0.0799                      | 1.326 | 0.987 | 0.043                         | 0.297 | 0.896 |
| ER ACC           | 4  | 3.8               | 3.949                       | 5.167 | 0.999 | 2.798                         | 0.302 | 0.891 |
| ER ACC           | 6  | 1.86              | 1.914                       | 3.693 | 0.981 | 1.256                         | 0.259 | 0.899 |
| ER ACC           | 8  | 0.64              | 0.679                       | 2.654 | 0.997 | 0.425                         | 0.248 | 0.838 |
| EO ACC           | 4  | 0.173             | 0.208                       | 0.838 | 0.993 | 0.089                         | 0.366 | 0.889 |
| EO ACC           | 6  | 0.44              | 0.448                       | 2.048 | 0.977 | 0.265                         | 0.277 | 0.883 |
| EO ACC           | 8  | 0.84              | 0.83                        | 6.394 | 0.99  | 0.658                         | 0.131 | 0.886 |

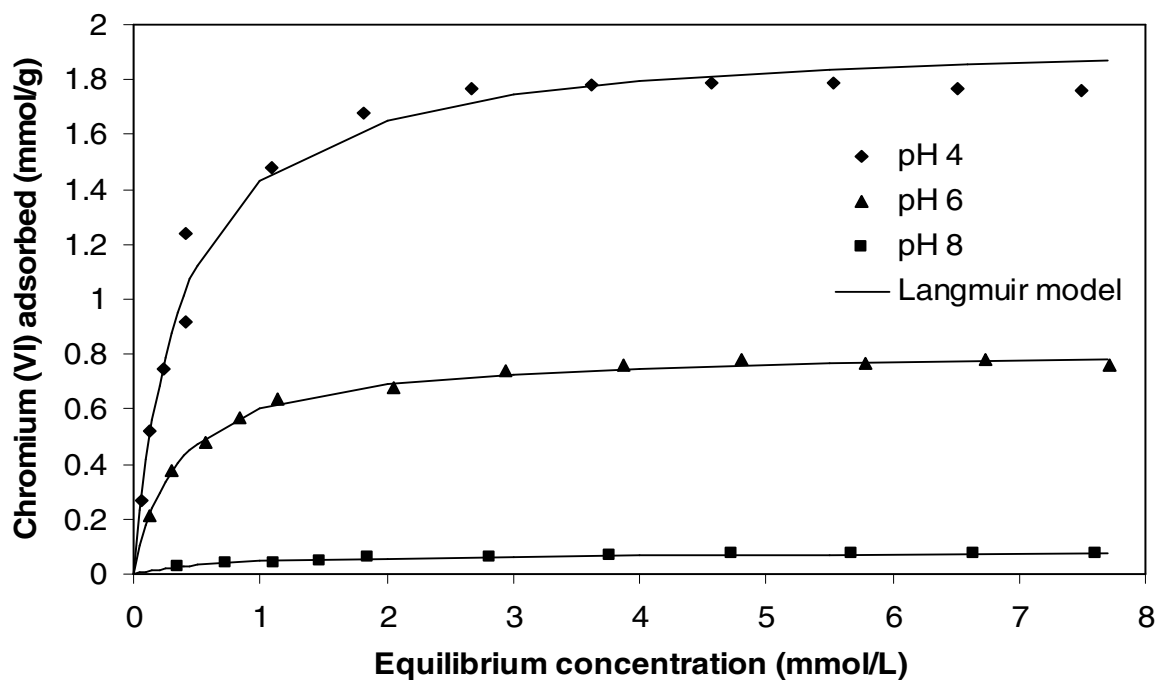

**Figure S4.** Sorption isotherms of chromium(VI) onto as-received ACC at pH 4, 6 and 8

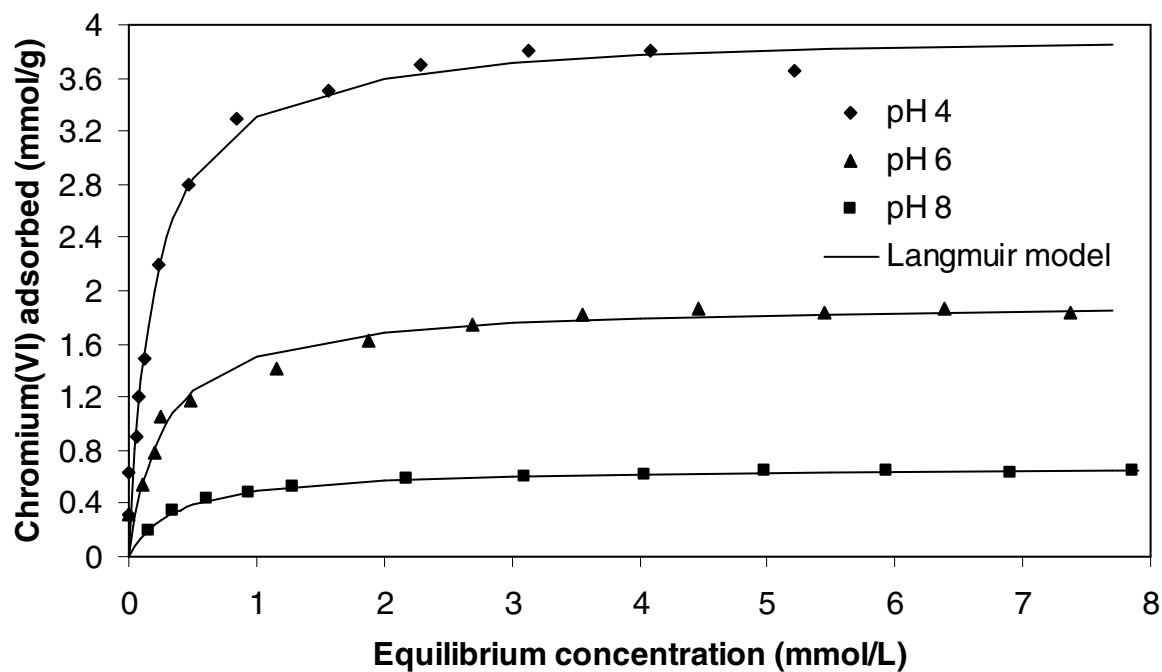

**Figure S5.** Sorption isotherms of chromium(VI) onto ER ACC at pH 4, 6 and 8

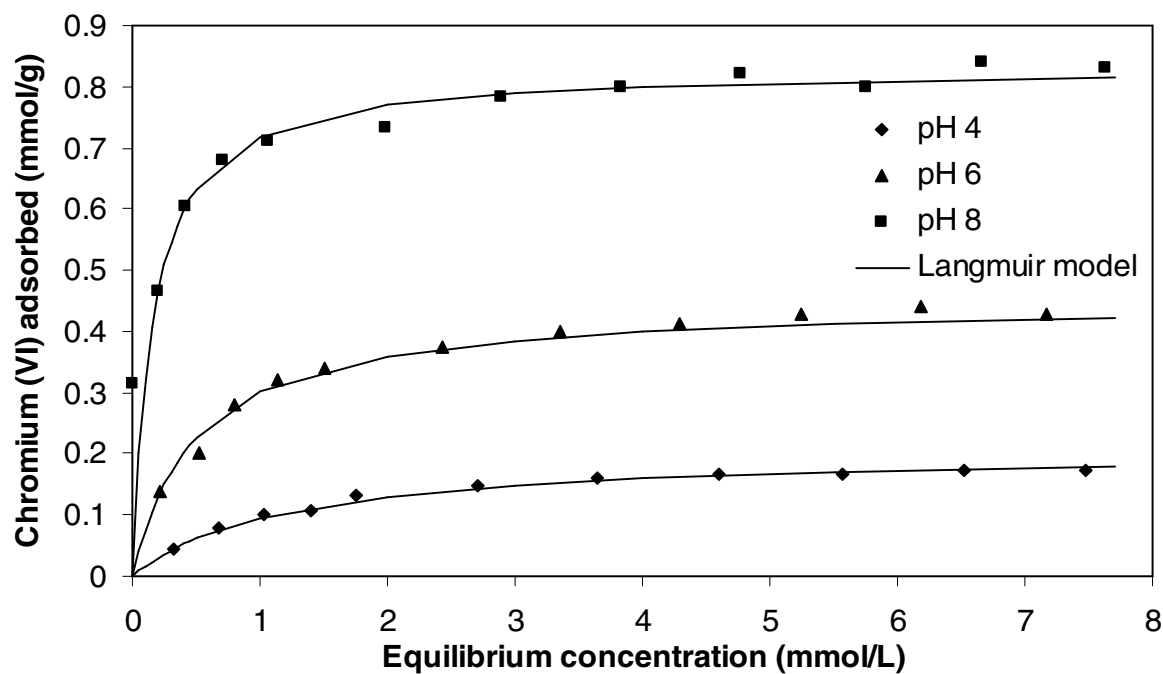

**Figure S6.** Sorption isotherms of chromium(VI) onto EO ACC at pH 4, 6 and 8
